# Supplementary material for: Contrasting metabolic strategies of two co-occurring deep-sea octocorals
Source: PubMed Central journal article supplement (PMC8138010; doi:10.1038/s41598-021-90134-5), 2021-05-20
Supplement: 41598_2021_90134_MOESM1_ESM.pdf [file 41598_2021_90134_MOESM1_ESM.pdf]

**Contrasting metabolic strategies of two co-occurring deep-sea  
octocorals**

Rakka M., Maier S. R., Van Oevelen D., Godinho A., Bilan M., Orejas C., Carreiro-Silva M.

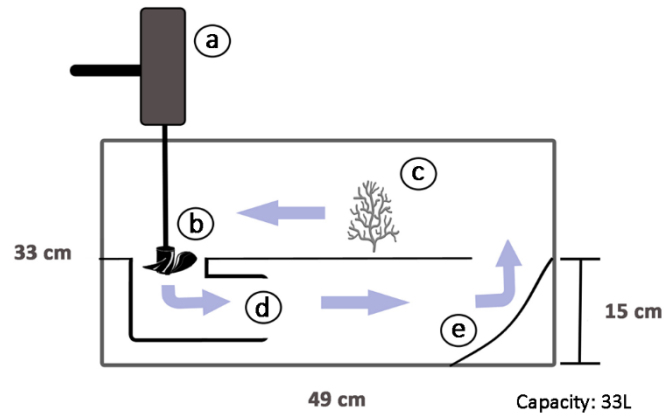

**Figure S1:** Experimental flumes used to determine the ability of the octocoral species *Dentomuricea* aff. *meteor* and *Viminella* *flagellum* to exploit different food substrates. Flume volume 33L. (a) Heavy duty motor; (b) 8 cm marine propeller; (c) coral fragment; (d) 9cm tube to direct flow; (e) platform used to facilitate flow direction.

**Table S1:** Coral colonies used in the feeding experiments, sampling locations and assignment of coral fragments to treatments and experimental aquaria

| Species               | Colony  | Latitude | Longitude | Sampling depth (m) | Fragment | Treatment | Aquaria |
|-----------------------|---------|----------|-----------|--------------------|----------|-----------|---------|
| <i>D. aff. meteor</i> | AC14    | 38.5406  | -29.0541  | 190-230            | AC14A    | FAST      | 8       |
|                       |         |          |           |                    | AC14B    | PHYTO     | 5       |
|                       |         |          |           |                    | AC14C    | ZOO       | 7       |
|                       |         |          |           |                    | AC14D    | ZOO       | 5       |
|                       |         |          |           |                    | AC14F    | PHYTO     | 6       |
|                       |         |          |           |                    | AC14G    | FAST      | 8       |
|                       |         |          |           |                    | AC14H    | DOM       | 5       |
|                       |         |          |           |                    | AC14J    | FAST      | 8       |
|                       |         |          |           |                    | AC14K    | DOM       | 7       |
|                       |         |          |           |                    | AC14M    | PHYTO     | 7       |
|                       |         |          |           |                    | AC14O    | DOM       | 6       |
|                       | AC14P   | ZOO      | 6         |                    |          |           |         |
|                       | AC1     | 38.5770  | -29.0180  | 230-240            | AC1A     | DOM       | 6       |
|                       |         |          |           |                    | AC1B     | ZOO       | 5       |
|                       |         |          |           |                    | AC1D     | PHYTO     | 5       |
|                       |         |          |           |                    | AC1E     | PHYTO     | 6       |
|                       |         |          |           |                    | AC1F     | DOM       | 5       |
|                       |         |          |           |                    | AC1H     | FAST      | 8       |
|                       |         |          |           |                    | AC1I     | ZOO       | 7       |
|                       |         |          |           |                    | AC1J     | DOM       | 7       |
| AC1K                  |         |          |           |                    | FAST     | 8         |         |
| AC1L                  |         |          |           |                    | ZOO      | 6         |         |
| AC1O                  |         |          |           |                    | FAST     | 8         |         |
| AC1P                  | PHYTO   | 7        |           |                    |          |           |         |
| AC26                  | 38.5406 | -29.0541 | 190-230   | AC26A              | PHYTO    | 5         |         |

|  |      |         |          |         |        |       |   |
|--|------|---------|----------|---------|--------|-------|---|
|  |      |         |          |         | AC26AB | ZOO   | 5 |
|  |      |         |          |         | AC26AH | DOM   | 7 |
|  |      |         |          |         | AC26AJ | DOM   | 6 |
|  |      |         |          |         | AC26AL | FAST  | 8 |
|  |      |         |          |         | AC26AM | ZOO   | 6 |
|  |      |         |          |         | AC26D  | ZOO   | 7 |
|  |      |         |          |         | AC26K  | PHYTO | 6 |
|  |      |         |          |         | AC26L  | FAST  | 8 |
|  |      |         |          |         | AC26P  | PHYTO | 7 |
|  |      |         |          |         | AC26Y  | FAST  | 8 |
|  |      |         |          |         | AC26Z  | DOM   | 5 |
|  | AC7A | 38.5770 | -29.0180 | 230-240 | AC7A   | FAST  | 8 |
|  |      |         |          |         | AC7AD  | ZOO   | 7 |
|  |      |         |          |         | AC7E   | FAST  | 8 |
|  |      |         |          |         | AC7F   | PHYTO | 5 |
|  |      |         |          |         | AC7G   | PHYTO | 7 |
|  |      |         |          |         | AC7I   | DOM   | 5 |
|  |      |         |          |         | AC7L   | ZOO   | 5 |
|  |      |         |          |         | AC7P   | FAST  | 8 |
|  |      |         |          |         | AC7T   | DOM   | 6 |
|  |      |         |          |         | AC7U   | PHYTO | 6 |
|  |      |         |          |         | AC7W   | ZOO   | 6 |
|  |      |         |          |         | AC7X   | DOM   | 7 |
|  | AC8A | 38.5770 | -29.0180 | 230-240 | AC8A   | ZOO   | 5 |
|  |      |         |          |         | AC8B   | DOM   | 7 |
|  |      |         |          |         | AC8C   | FAST  | 8 |
|  |      |         |          |         | AC8D   | PHYTO | 6 |
|  |      |         |          |         | AC8F   | DOM   | 5 |
|  |      |         |          |         | AC8K   | FAST  | 8 |
|  |      |         |          |         | AC8L   | ZOO   | 6 |
|  |      |         |          |         | AC8M   | PHYTO | 7 |

|                     |         |          |          |         |       |       |   |
|---------------------|---------|----------|----------|---------|-------|-------|---|
|                     |         |          |          |         | AC8N  | DOM   | 6 |
|                     |         |          |          |         | AC8O  | ZOO   | 7 |
|                     |         |          |          |         | AC8P  | FAST  | 8 |
|                     |         |          |          |         | AC8R  | PHYTO | 5 |
| <i>V. flagellum</i> | AC10    | 38.5396  | -29.0399 | 190-210 | AC10C | FAST  | 6 |
|                     |         |          |          |         | AC10D | PHYTO | 7 |
|                     |         |          |          |         | AC10L | ZOO   | 5 |
|                     |         |          |          |         | AC10M | DOM   | 8 |
|                     | AC11    | 38.5396  | -29.0399 | 190-210 | AC11A | DOM   | 5 |
|                     |         |          |          |         | AC11B | FAST  | 6 |
|                     |         |          |          |         | AC11C | PHYTO | 7 |
|                     |         |          |          |         | AC11G | ZOO   | 8 |
|                     | AC12    | 38.5396  | -29.0399 | 190-210 | AC12A | PHYTO | 7 |
|                     |         |          |          |         | AC12C | FAST  | 5 |
|                     |         |          |          |         | AC12E | DOM   | 8 |
|                     |         |          |          |         | AC12F | ZOO   | 6 |
|                     | AC13    | 38.5770  | -29.0180 | 230-240 | AC13A | FAST  | 8 |
|                     |         |          |          |         | AC13B | PHYTO | 6 |
|                     |         |          |          |         | AC13C | ZOO   | 5 |
|                     |         |          |          |         | AC13D | DOM   | 7 |
|                     | AC15    | 38.5770  | -29.0180 | 230-240 | AC15A | PHYTO | 6 |
|                     |         |          |          |         | AC15B | DOM   | 7 |
|                     |         |          |          |         | AC15C | ZOO   | 8 |
|                     |         |          |          |         | AC15D | FAST  | 5 |
|                     | AC16    | 38.5396  | -29.0399 | 190-210 | AC16A | DOM   | 8 |
| AC16D               |         |          |          |         | ZOO   | 6     |   |
| AC16E               |         |          |          |         | PHYTO | 5     |   |
| AC16I               |         |          |          |         | FAST  | 7     |   |
| AC17                | 38.5396 | -29.0399 | 190-210  | AC17A   | PHYTO | 8     |   |
|                     |         |          |          | AC17D   | ZOO   | 5     |   |
|                     |         |          |          | AC17F   | FAST  | 6     |   |

|      |         |          |         |       |       |   |
|------|---------|----------|---------|-------|-------|---|
|      |         |          |         | AC17G | DOM   | 7 |
| AC27 | 37.6012 | -25.8824 | 250-255 | AC27A | DOM   | 5 |
|      |         |          |         | AC27B | PHYTO | 8 |
|      |         |          |         | AC27D | ZOO   | 6 |
|      |         |          |         | AC27H | FAST  | 7 |
| AC29 | 37.6012 | -25.8824 | 250-255 | AC29A | PHYTO | 5 |
|      |         |          |         | AC29D | FAST  | 7 |
|      |         |          |         | AC29F | ZOO   | 8 |
|      |         |          |         | AC29H | DOM   | 6 |
| AC30 | 37.6012 | -25.8824 | 250-255 | AC30A | PHYTO | 5 |
|      |         |          |         | AC30B | DOM   | 6 |
|      |         |          |         | AC30C | FAST  | 8 |
|      |         |          |         | AC30D | ZOO   | 7 |
| AC9  | 38.5396 | -29.0399 | 190-210 | AC9A  | DOM   | 6 |
|      |         |          |         | AC9B  | ZOO   | 7 |
|      |         |          |         | AC9C  | PHYTO | 8 |
|      |         |          |         | AC9D  | FAST  | 5 |
| AV9  | 38.5770 | -29.0180 | 230-240 | AV9A  | PHYTO | 6 |
|      |         |          |         | AV9B  | ZOO   | 7 |
|      |         |          |         | AV9C  | DOM   | 5 |
|      |         |          |         | AV9D  | FAST  | 8 |

**Table S2:** Characteristics of coral fragments of the octocoral species *Dentomuricea* aff. *meteor* and *Viminella flagellum* used in the different experimental treatments.

|                            | <i>D. aff. meteor</i> |                |                |                | <i>V. flagellum</i> |                |                |                |
|----------------------------|-----------------------|----------------|----------------|----------------|---------------------|----------------|----------------|----------------|
|                            | FAST                  | PHYTO          | DOM            | ZOO            | FAST                | PHYTO          | DOM            | ZOO            |
| <b>Dry weight (g)</b>      | 0.28 ±<br>0.15        | 0.30 ±<br>0.16 | 0.29 ±<br>0.17 | 0.35 ±<br>0.17 | 1.58 ±<br>0.87      | 1.74 ±<br>1.14 | 1.44 ±<br>1.03 | 1.63 ±<br>0.93 |
| <b>Skeletal weight (g)</b> | 0.04 ±<br>0.02        | 0.04 ±<br>0.02 | 0.04 ±<br>0.02 | 0.05 ±<br>0.03 | 1.24 ±<br>0.79      | 1.41 ±<br>1.05 | 1.0 ±<br>0.87  | 1.31 ±<br>0.84 |
| <b>Org. C content (%)</b>  | 7.09 ±<br>2.18        | 6.96 ±<br>1.96 | 7.03 ± 1.7     | 7.29 ±<br>1.25 | 7.36 ±<br>1.6       | 8.00 ±<br>1.7  | 8.22 ±<br>1.11 | 8.41 ±<br>1.40 |

**Table S3:** Summary of the model building procedure of Linear Mixed Effects models (LME) and Generalized Least-Square models (GLS) to investigate the effect of different food substrates (food treatments) on metabolic processes of the octocoral species *Dentomuricea* aff. *meteor* and *Viminella flagellum*. Model building was done by assessing the Akaike Information Criteria (AIC) for every model and the summaries of Likelihood Ratio Tests, including the L-ratio value, degrees of freedom (df) and p-value.

| Species        |                        |                    | <i>D.meteor</i> |        |         |         | <i>V.flagellum</i> |        |         |         |        |
|----------------|------------------------|--------------------|-----------------|--------|---------|---------|--------------------|--------|---------|---------|--------|
| Variable group | Dependent variable     | Independent factor | AIC             | df     | L ratio | p value | AIC                | df     | L ratio | p value |        |
| Tissue         | Dry weight             | null               | -68.98          | 3.00   |         |         | 106.62             | 3.00   |         |         |        |
|                |                        | Treatment          | -66.10          | 6.00   | 3.12    | 0.37    | 110.39             | 6.00   | 2.23    | 0.53    |        |
|                | Tissue weight          | null               | -               | 284.64 | 3.00    |         |                    | 90.33  | 3.00    |         |        |
|                |                        | Treatment          | -               | 281.35 | 6.00    | 2.70    | 0.44               | 92.59  | 6.00    | 3.74    | 0.29   |
|                | Skeletal weight        | null               | -85.28          | 3.00   |         |         |                    | -33.21 | 3.00    |         |        |
|                |                        | Treatment          | -82.73          | 6.00   | 3.44    | 0.33    |                    | -27.31 | 6.00    | 0.11    | 0.99   |
|                | Organic carbon content | null               | 192.35          | 3.00   |         |         |                    | 167.74 | 3.00    |         |        |
|                |                        | Treatment          | 197.42          | 6.00   | 0.93    | 0.82    |                    | 166.72 | 6.00    | 7.01    | 0.07   |
|                | Nitrogen content       | null               | 31.35           | 3.00   |         |         |                    | 56.90  | 3.00    |         |        |
|                |                        | Treatment          | 37.15           | 6.00   | 0.21    | 0.98    |                    | 52.47  | 6.00    | 10.42   | 0.02   |
|                | C/N                    | null               | 33.84           | 3.00   |         |         |                    | -37.71 | 5.00    |         |        |
|                |                        | Treatment          | 23.90           | 6.00   | 15.94   | 0.00    |                    | -40.17 | 8.00    | 8.46    | 0.04   |
|                | Tracer C incorporation | null               | 236.94          | 5.00   |         |         |                    | 111.01 | 4.00    |         |        |
|                |                        | Treatment          | 175.13          | 7.00   | 65.80   | <0.0001 |                    | 89.50  | 6.00    | 25.50   | <0.001 |
|                | Tracer N incorporation | null               | 84.09           | 5.00   |         |         |                    | 18.78  | 4.00    |         |        |
|                |                        | Treatment          | 16.52           | 7.00   | 71.56   | <0.0001 |                    | 1.89   | 6.00    | 20.80   | <0.001 |



|                        |                             |           |        |        |       |       |         |         |       |      |      |
|------------------------|-----------------------------|-----------|--------|--------|-------|-------|---------|---------|-------|------|------|
| <b>Respiration</b>     | <b>Oxygen consumption</b>   | null      | 43.12  | 3.00   |       |       | 27.82   | 3.00    |       |      |      |
|                        |                             | Treatment | 36.80  | 6.00   | 12.20 | 0.01  | 13.49   | 6.00    | 20.33 | 0.00 |      |
|                        | <b>DIC Bulk respiration</b> | null      |        |        |       |       | -10.16  | 2.00    |       |      |      |
|                        |                             | Treatment |        |        |       |       | -6.93   | 4.00    | 0.76  | 0.68 |      |
|                        | <b>Tracer C respiration</b> | null      | -33.83 | 3.00   |       |       | -74.46  | 4.00    |       |      |      |
|                        |                             | Treatment | -37.76 | 4.00   | 5.93  | 0.01  | -80.16  | 6.00    | 9.70  | 0.01 |      |
| <b>POC/PON Release</b> | <b>POC bulk release</b>     | null      | -30.56 | 5.00   |       |       | -56.60  | 2.00    |       |      |      |
|                        |                             | Treatment | -39.21 | 8.00   | 14.64 | 0.00  | -55.22  | 4.00    | 2.61  | 0.27 |      |
|                        | <b>Tracer C release</b>     | null      | -82.57 | 4.00   |       |       | -156.50 | 4.00    |       |      |      |
|                        |                             | Treatment | -86.93 | 6.00   | 8.36  | 0.02  | -165.50 | 6.00    | 13.00 | 0.00 |      |
|                        | <b>PON bulk Release</b>     | null      | -85.10 | 2.00   |       |       | -110.05 | 4.00    |       |      |      |
|                        |                             | Treatment | -85.20 | 5.00   | 6.13  | 0.11  | -116.90 | 6.00    | 10.90 | 0.00 |      |
|                        | <b>Tracer N excretion</b>   | null      | -      | 128.76 | 4.00  |       |         | -251.40 | 4.00  |      |      |
|                        |                             | Treatment | -      | 139.80 | 6.00  | 15.03 | 0.00    | -255.40 | 6.00  | 7.94 | 0.02 |
